# Supplementary material
Source: Springer Nature journal article supplement (https://www.springerprofessional.de/resource/supplementary/13638_2013_753_MOESM3_ESM.pdf/11898378)
Supplement: MOESM3 [file 11898378]

|     |         |      |      |       |           |                  |
|-----|---------|------|------|-------|-----------|------------------|
| ... | RREQ ID | XPos | YPos | Speed | Direction | Link reliability |
|-----|---------|------|------|-------|-----------|------------------|

(a) *AODV-R RREQ structure*

|     |           |                     |                  |           |                   |
|-----|-----------|---------------------|------------------|-----------|-------------------|
| ... | Hop count | Destination address | Original address | Life time | Route reliability |
|-----|-----------|---------------------|------------------|-----------|-------------------|

(b) *AODV-R RREP structure*

|     |                     |          |        |             |       |                   |
|-----|---------------------|----------|--------|-------------|-------|-------------------|
| ... | Destination address | Next hop | Seq No | Route timer | State | Route reliability |
|-----|---------------------|----------|--------|-------------|-------|-------------------|

(c) *AODV-R routing table entry structure*
